# Supplementary material for: Detecting Patient Deterioration Early Using Continuous Heart rate and Respiratory rate Measurements in Hospitalized COVID-19 Patients
Source: Springer Nature journal article supplement (doi:10.1007/s10916-022-01898-w), 2023-01-24

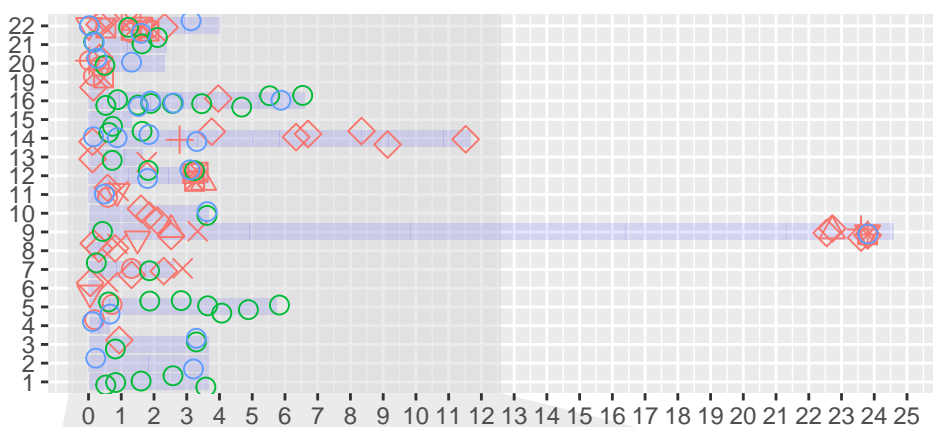

### Event type

- Check-up
- △ Diagnostics
- + Fever / sepsis
- × ICU admission
- ◇ O2
- ▽ RRT Call
- ⊠ Serious medical event

### Source

- EMR
- Physician 1
- Physician 2

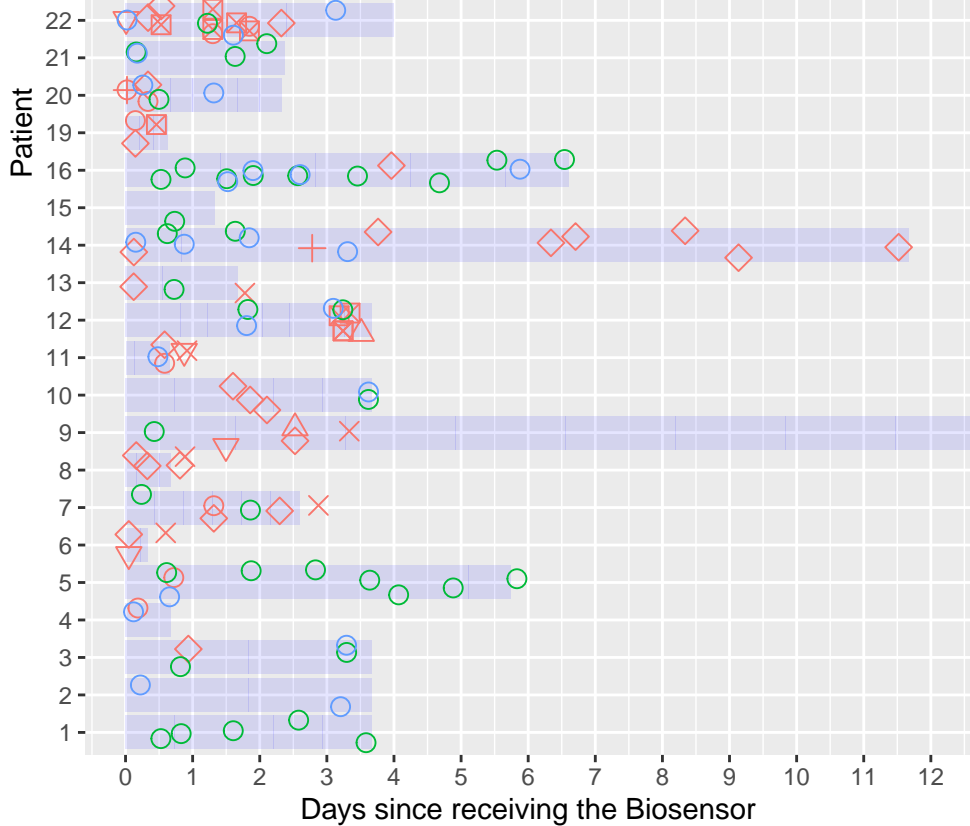

Supplement: MOESM1 [file 23949510]
