# Supplementary material for: Detecting Patient Deterioration Early Using Continuous Heart rate and Respiratory rate Measurements in Hospitalized COVID-19 Patients
Source: Springer Nature journal article supplement (doi:10.1007/s10916-022-01898-w), 2023-01-24
Supplement: MOESM3 [file 23949510]

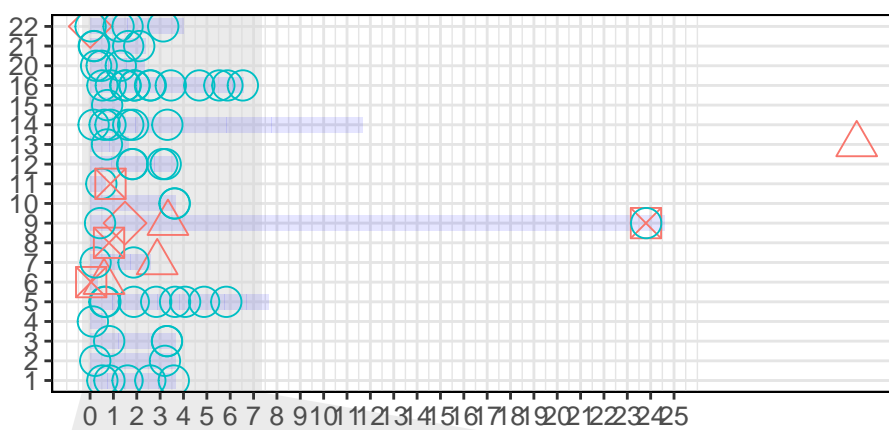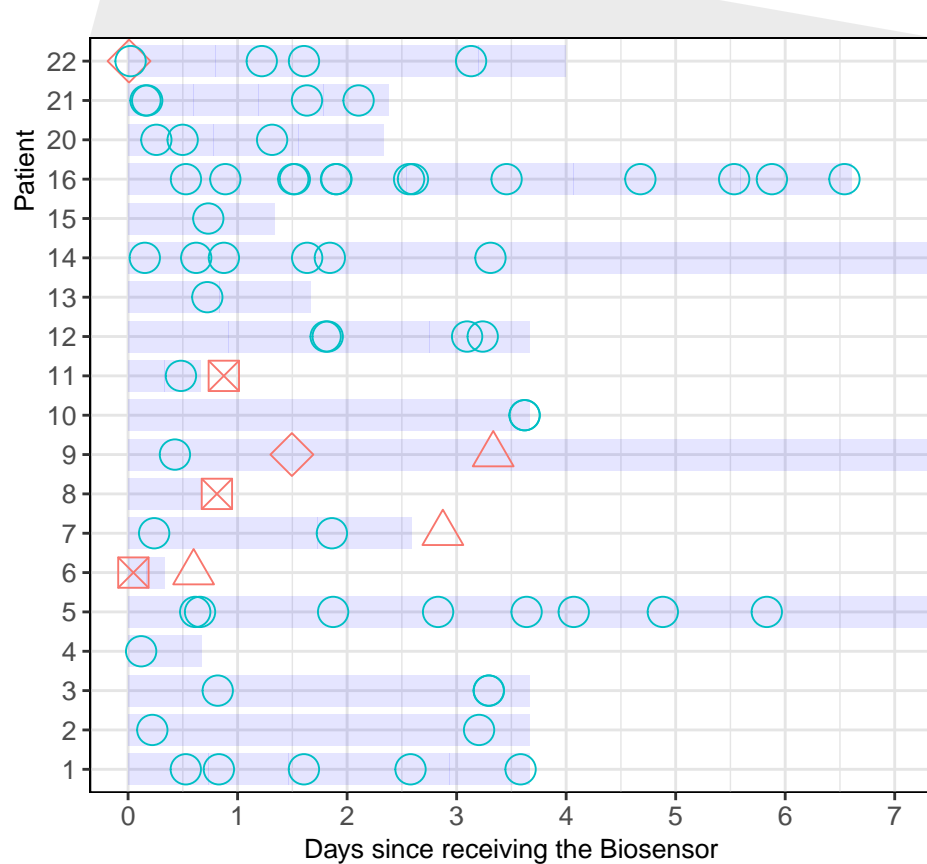

-  Check-up
-  ICU admission
-  RRT Call
-  Severe combined event

-  EMR
-  Physician
